# Supplementary material for: Impact of dust addition on the metabolism of Mediterranean plankton communities and carbon export under present and future conditions of pH and temperature
Source: Copernicus journal article supplement (doi:10.5194/bg-18-5423-2021), 2021-10-06
Supplement: Supplementary file 1 [file bg-18-5423-2021-supplement.pdf]

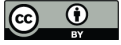

*Supplement of*

## **Impact of dust addition on the metabolism of Mediterranean plankton communities and carbon export under present and future conditions of pH and temperature**

**Frédéric Gazeau et al.**

*Correspondence to:* Frédéric Gazeau ([frederic.gazeau@imev-mer.fr](mailto:frederic.gazeau@imev-mer.fr))

The copyright of individual parts of the supplement might differ from the article licence.

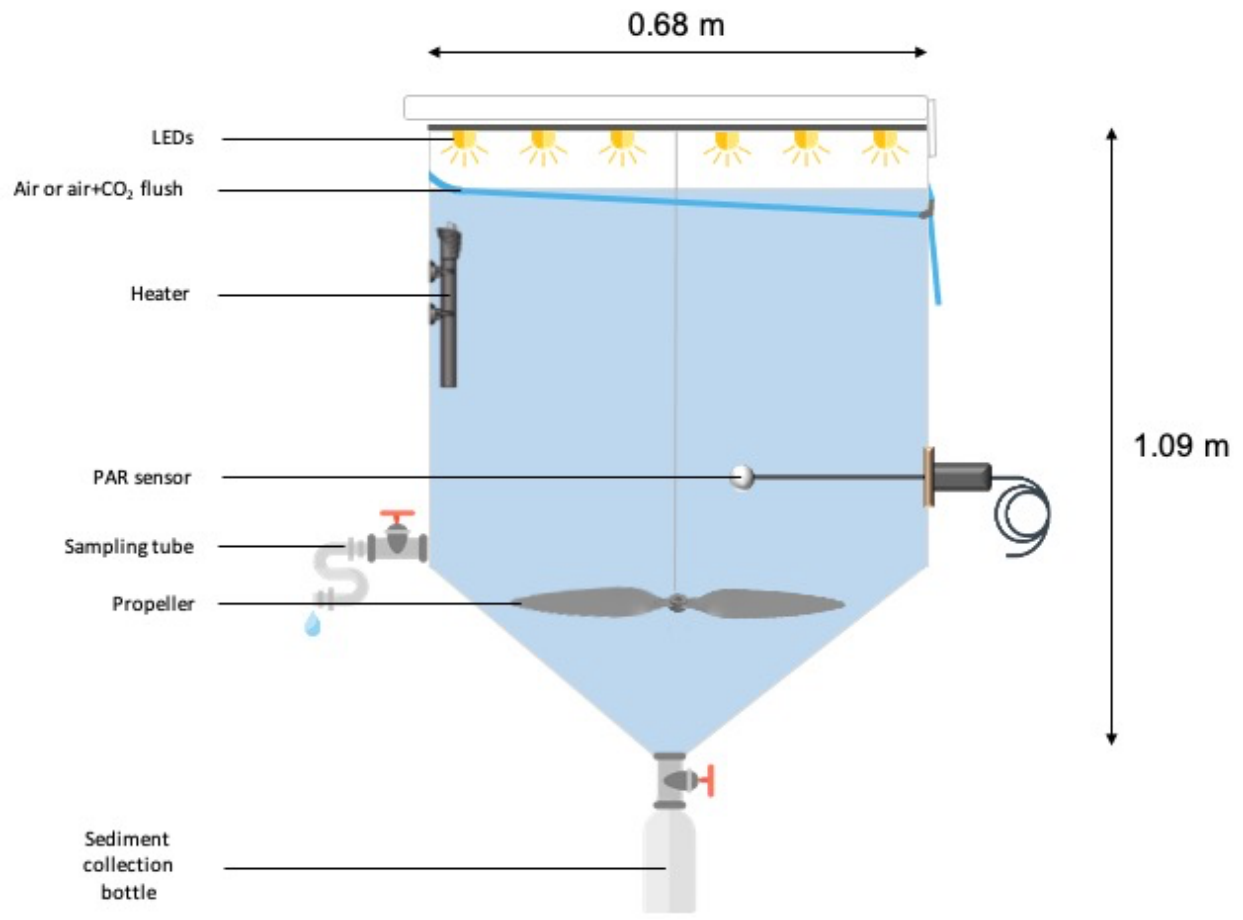

1422

1423 Fig. S1. Diagram of an experimental tank.

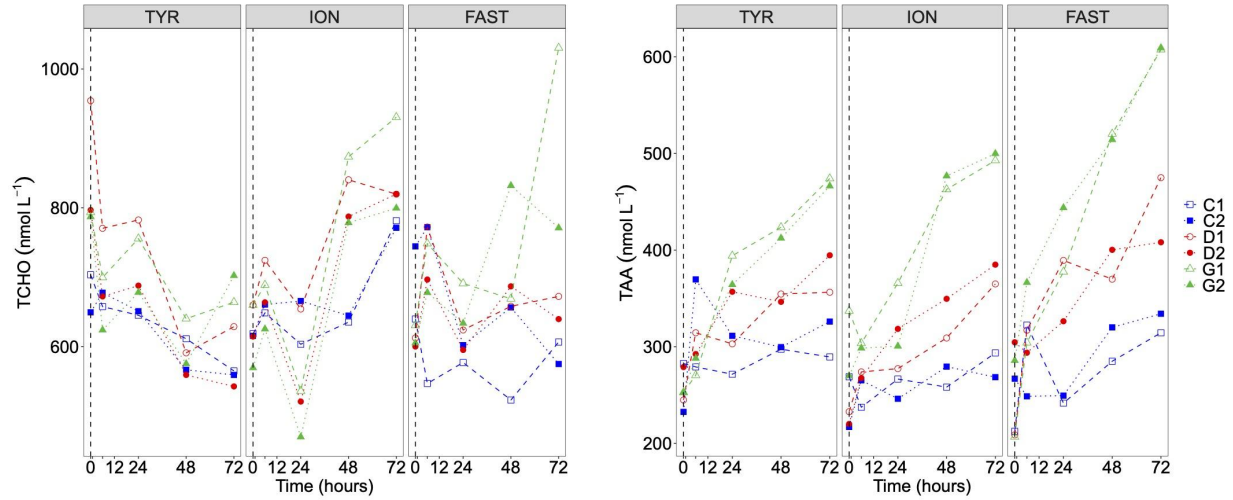

1424

1425 Fig. S2. Total hydrolysable carbohydrate (TCHO) and amino acids (TAA) concentrations in the  
 1426 six tanks (controls: C1, C2; dust addition under present conditions of temperature and pH: D1,  
 1427 D2; dust addition under future conditions of temperature and pH: G1 and G2) during the three  
 1428 experiments (TYR, ION and FAST). The dashed vertical line indicates the time of seeding (after  
 1429  $t_0$ ).

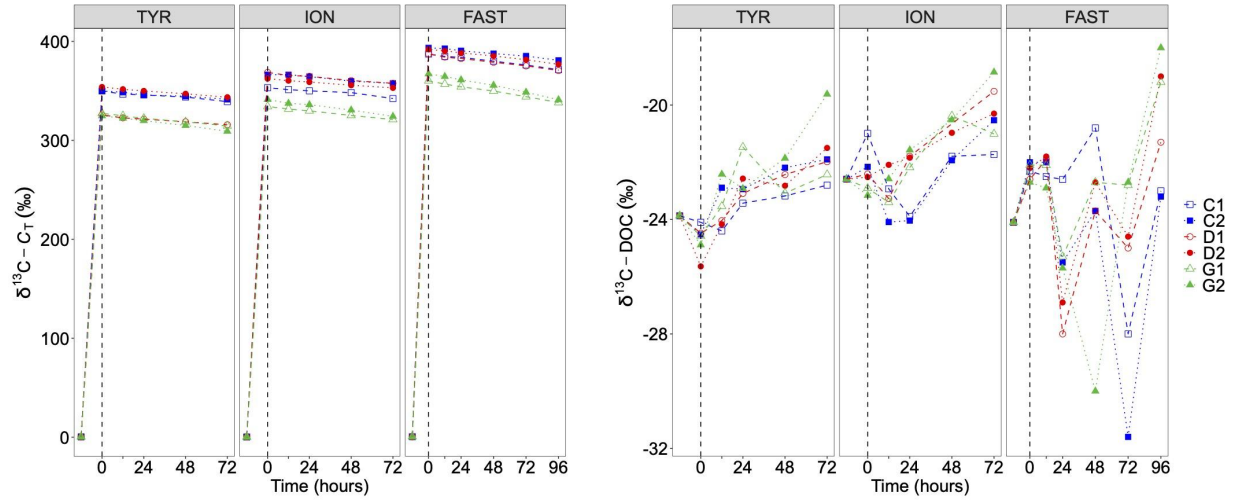

1430

1431 Fig. S3. Isotopic signature of dissolved inorganic carbon ( $\delta^{13}\text{C}-C_T$ ) and incorporation of  $^{13}\text{C}$  into  
 1432 dissolved organic carbon ( $\delta^{13}\text{C}-\text{DOC}$ ) in the six tanks (controls: C1, C2; dust addition under  
 1433 present conditions of temperature and pH: D1, D2; dust addition under future conditions of  
 1434 temperature and pH: G1 and G2) during the three experiments (TYR, ION and FAST). The  
 1435 dashed vertical line indicates the time of seeding (after  $t_0$ ).

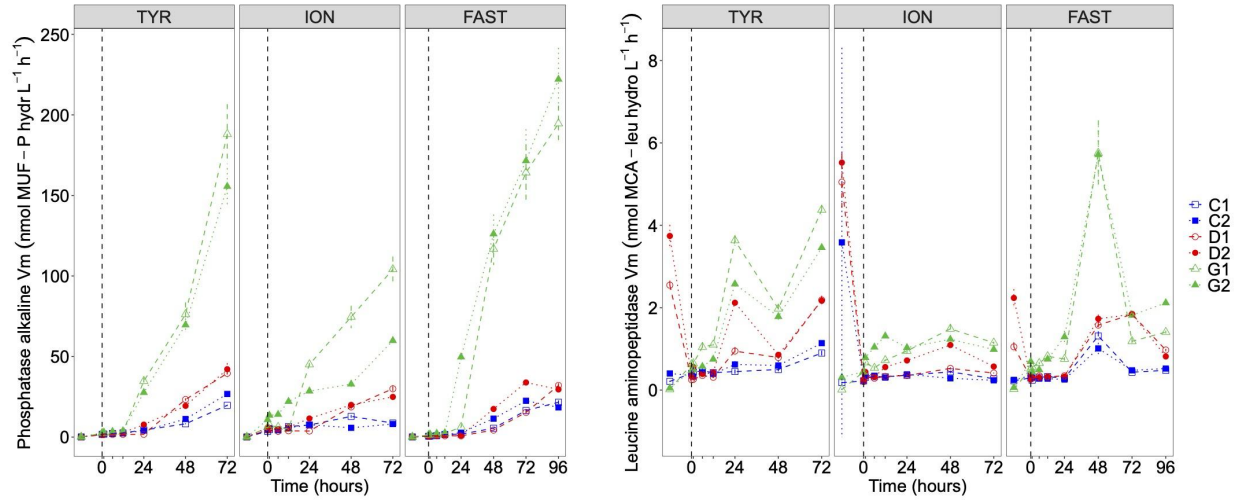

1436

1437

Fig. S4. Maximum hydrolysis velocity ( $V_m$ ) of the phosphatase alkaline and leucine

1438

aminopeptidase (over 1-2 h incubations) on samples taken in the six tanks (controls: C1, C2; dust

1439

addition under present conditions of temperature and pH: D1, D2; dust addition under future

1440

conditions of temperature and pH: G1 and G2) during the three experiments (TYR, ION and

1441

FAST).

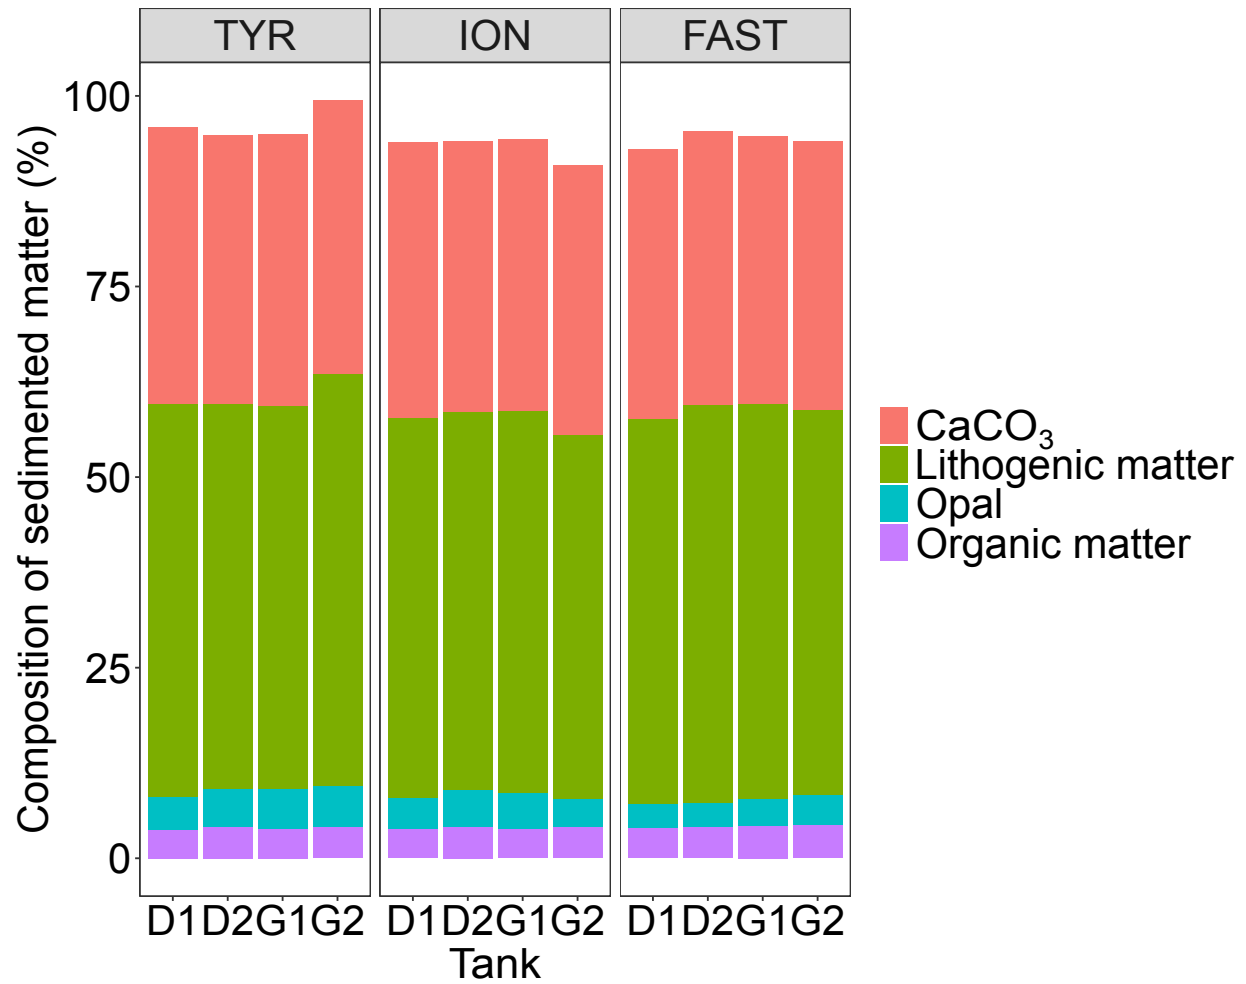

1442

1443 Fig. S5. Proportion (%) of the different fractions analyzed in the recovered sedimented matter at  
 1444 the end of the three experiments (TYR, ION and FAST) in dust enriched minicosms (D1, D2, G1  
 1445 and G2).
